# Supplementary material
Source: PubMed Central journal article supplement (PMC6028945)
Supplement: supp_RA118.002884_136638_1_supp_127439_p80f3q.pdf [file supp_RA118.002884_136638_1_supp_127439_p80f3q.pdf]

# Supporting Information

## Identification of the allosteric site for neutral amino acids in the maize C4-isozyme of phosphoenolpyruvate carboxylase: The critical role of Ser100

Lilian González-Segura<sup>1</sup>, Carlos Mújica-Jiménez<sup>1</sup>, Javier-Andrés Juárez-Díaz<sup>2</sup>, Rodrigo Güémez-Toro<sup>1</sup>, León P. Martínez-Castilla<sup>1</sup>,  
and Rosario A. Muñoz-Clares<sup>1\*</sup>

<sup>1</sup>Departamento de Bioquímica, Facultad de Química, <sup>2</sup>Departamento de Biología Comparada, Facultad de Ciencias. Universidad Nacional Autónoma de México, Ciudad Universitaria, 04510, Ciudad de México, México.

Running title: Allosteric-site for neutral amino acids in *ZmPEPC-C4*

\*To whom correspondence should be addressed: [clares@unam.mx](mailto:clares@unam.mx)

Materials include Table S1, Table S2, Figure S1, Figure S2, Figure S3, Figure S4, Figure S5, Figure S6

**Table S1. PEPC-C4 isozymes used in the multiple sequence analysis**

<sup>a</sup>Amino acid sequences were retrieved from GeneBank with the exception of those from *Miscanthus sinensis*, *Panicum virgatum*, *Setaria italic*, *Setaria viridis* and *Sorghum bicolor* that were found in Phytozome 12.1.5; only those sequences having a serine at position equivalent to 780 of *Zea mays* PEPC-C4 (*ZmPEPC-C4*, CAA33317) were considered. <sup>b</sup>Most sequences are fragments lacking part of the N-terminal and/or C-terminal regions, only those marked with \* are complete; those marked with † are the result of adding two consecutive sequence fragments reported in separate papers. <sup>c</sup>Numbers in parenthesis indicate the bibliographic reference of the paper where the sequence was reported, when any, given below the table. <sup>d</sup>Residues numbering is that of *ZmPEPC-C4* (CAA33317).

| PLANT FAMILY      | C4-PLANT SPECIES                             | ACCESSION NUMBER <sup>a</sup> | RESIDUES <sup>b</sup> (Ref.) <sup>c</sup> | POSITION 100 <sup>d</sup> | POSITION 937 <sup>d</sup> |
|-------------------|----------------------------------------------|-------------------------------|-------------------------------------------|---------------------------|---------------------------|
| <b>MONOCOTS</b>   |                                              |                               |                                           |                           |                           |
| <i>Cyperaceae</i> |                                              |                               |                                           |                           |                           |
|                   | <i>Bulbostylis barbata</i>                   | CAR63753                      | 427 (1)                                   | —                         | —                         |
|                   | <i>Cyperus capitatus</i>                     | CAR63763                      | 446 (1)                                   | —                         | —                         |
|                   | <i>Cyperus distichus</i>                     | CAR63822                      | 456 (1)                                   | —                         | —                         |
|                   | <i>Cyperus esculentus</i>                    | ARK19505                      | 965*                                      | Lys                       | Asp                       |
|                   | <i>Cyperus iria</i>                          | CAR63823                      | 400 (1)                                   | —                         | —                         |
|                   | <i>Cyperus longus</i>                        | CAR63765                      | 456 (1)                                   | —                         | —                         |
|                   | <i>Cyperus papyrus</i>                       | CAR63766                      | 453 (1)                                   | —                         | —                         |
|                   | <i>Cyperus pedunculatus</i>                  | CAR63806                      | 400 (1)                                   | —                         | —                         |
|                   | <i>Cyperus rotundus</i>                      | CAR63768                      | 400 (1)                                   | —                         | —                         |
|                   | <i>Cyperus sanguinolentus</i>                | CAR63805                      | 456 (1)                                   | —                         | —                         |
|                   | <i>Cyperus ustulatus</i>                     | CAR63770                      | 456 (1)                                   | —                         | —                         |
|                   | <i>Cyperus ustulatus</i>                     | CAR63771                      | 435 (1)                                   | —                         | —                         |
|                   | <i>Eleocharis baldwinii</i>                  | CAR63773                      | 400 (1)                                   | —                         | —                         |
|                   | <i>Eleocharis vivipara</i>                   | CAR63788                      | 456 (1)                                   | —                         | —                         |
|                   | <i>Eleocharis vivipara</i>                   | BAC19851                      | 968* (2)                                  | Lys                       | Asp                       |
|                   | <i>Fimbristylis dichotoma</i>                | CAR63791                      | 262 (1)                                   | —                         | —                         |
|                   | <i>Fimbristylis dichotoma</i>                | CAR63792                      | 273 (1)                                   | —                         | —                         |
|                   | <i>Fimbristylis ferruginea</i>               | CAR63794                      | 400 (1)                                   | —                         | —                         |
|                   | <i>Fimbristylis littoralis</i>               | CAR63796                      | 400 (1)                                   | —                         | —                         |
|                   | <i>Rhynchospora globosa</i>                  | CAR63809                      | 429 (1)                                   | —                         | —                         |
|                   | <i>Rhynchospora globosa</i>                  | CAR63810                      | 350 (1)                                   | —                         | —                         |
|                   | <i>Rhynchospora rubra</i>                    | CAR63812                      | 400 (1)                                   | —                         | —                         |
| <i>Poaceae</i>    |                                              |                               |                                           |                           |                           |
|                   | <i>Aeluropus littoralis</i>                  | AJR16760                      | 229                                       | —                         | —                         |
|                   | <i>Alloteropsis angusta</i>                  | CCA60833                      | 502 (3)                                   | —                         | Gly                       |
|                   | <i>Alloteropsis cimicina</i>                 | CCA60994                      | 846 (3)                                   | —                         | Glu                       |
|                   | <i>Alloteropsis semialata subs semialata</i> | CCA60991                      | 835 (3)                                   | —                         | Gly                       |
|                   | <i>Andropogon gerardii</i>                   | CAM84081                      | 439 (4)                                   | —                         | —                         |
|                   | <i>Anthraenantia lanata</i>                  | CAM84072                      | 439 (4)                                   | —                         | —                         |
|                   | <i>Apluda mutica</i>                         | AHA39157                      | 303 (5)                                   | —                         | —                         |
|                   | <i>Aristida adscensionis</i>                 | CAM84082                      | 438 (4)                                   | —                         | —                         |
|                   | <i>Aristida rhinichloa</i>                   | CAM84083                      | 438 (4)                                   | —                         | —                         |
|                   | <i>Arundinella deppeana</i>                  | CAM84086                      | 439 (4)                                   | —                         | —                         |
|                   | <i>Bothriochloa ischaemum</i>                | CAM84087                      | 439 (4)                                   | —                         | —                         |
|                   | <i>Bothriochloa saccharoides</i>             | CAM84049                      | 439 (4)                                   | —                         | —                         |

[continued on next page]

Table S1 (continued)

| PLANT FAMILY | C4-PLANT SPECIES                 | ACCESSION NUMBER <sup>a</sup> | RESIDUES <sup>b</sup> (Ref.) <sup>c</sup> | POSITION 100 <sup>d</sup> | POSITION 937 <sup>d</sup> |
|--------------|----------------------------------|-------------------------------|-------------------------------------------|---------------------------|---------------------------|
|              | <i>Capillipedium parviflorum</i> | CAM84091                      | 439 (4)                                   | —                         | —                         |
|              | <i>Cenchrus americanus</i>       | ADV92634                      | 959* (6)                                  | Ser                       | Gly                       |
|              | <i>Centropodia forskalii</i>     | CAM84094                      | 439 (4)                                   | —                         | —                         |
|              | <i>Chloris gayana</i>            | AAG42288                      | 955*                                      | Ser                       | Asp                       |
|              | <i>Chrysopogon serrulatus</i>    | AHA39105                      | 347 (5)                                   | —                         | —                         |
|              | <i>Chrysopogon zizanioides</i>   | CAM84148                      | 439 (4)                                   | —                         | —                         |
|              | <i>Coix lacryma-jobi</i>         | CAM84097                      | 439 (4)                                   | —                         | —                         |
|              | <i>Cynodon dactylon</i>          | CAM84101                      | 439 (4)                                   | —                         | —                         |
|              | <i>Cymbopogon citratus</i>       | CAM84102                      | 439 (4)                                   | —                         | —                         |
|              | <i>Dactyloctenium aegyptium</i>  | CAM84047                      | 439 (4)                                   | —                         | —                         |
|              | <i>Digitaria ciliaris</i>        | CAM84051                      | 439 (4)                                   | —                         | —                         |
|              | <i>Digitaria didactyla</i>       | CAM84050                      | 439 (4)                                   | —                         | —                         |
|              | <i>Digitaria sanguinalis</i>     | CAM83971                      | 627 (4)                                   | —                         | Asp                       |
|              | <i>Echinochloa crus-galli</i>    | AAX98688                      | 964*                                      | Gly                       | Gly                       |
|              | <i>Echinochloa esculenta</i>     | CAM84052                      | 439 (4)                                   | —                         | —                         |
|              | <i>Eleusine coracana</i>         | AEG78556                      | 278 (7)                                   | —                         | —                         |
|              | <i>Eleusine floccifolia</i>      | AEF58974                      | 260 (7)                                   | —                         | —                         |
|              | <i>Eleusine indica</i>           | CAM84054                      | 439 (4)                                   | —                         | —                         |
|              | <i>Eleusine intermedia</i>       | AEF58978                      | 146 (7)                                   | —                         | —                         |
|              | <i>Eleusine jaegeri</i>          | AEF58979                      | 260 (7)                                   | —                         | —                         |
|              | <i>Eleusine kigeziensis</i>      | AEG78571                      | 278 (7)                                   | —                         | —                         |
|              | <i>Eleusine kigeziensis</i>      | AEG78572                      | 278 (7)                                   | —                         | —                         |
|              | <i>Eleusine multiflora</i>       | AEF58990                      | 259 (7)                                   | —                         | —                         |
|              | <i>Eleusine tristachya</i>       | AEF58992                      | 259 (7)                                   | —                         | —                         |
|              | <i>Enteropogon prieurii</i>      | CAM84056                      | 439 (4)                                   | —                         | —                         |
|              | <i>Eragrostis capensis</i>       | CAM84058                      | 439 (4)                                   | —                         | —                         |
|              | <i>Eragrostis minor</i>          | CAM84059                      | 439 (4)                                   | —                         | —                         |
|              | <i>Eriochloa nana</i>            | CCB84861                      | 424 (3)                                   | —                         | —                         |
|              | <i>Eulalia aurea</i>             | CAM84060                      | 439 (4)                                   | —                         | —                         |
|              | <i>Hyparrhenia hirta</i>         | CAM84064                      | 439 (4)                                   | —                         | —                         |
|              | <i>Imperata cylindrica</i>       | CAM84068                      | 439 (4)                                   | —                         | —                         |
|              | <i>Lepturus repens</i>           | CAM84073                      | 439 (4)                                   | —                         | —                         |
|              | <i>Megathyrsus maximus</i>       | CCA60995                      | 936 (3)                                   | Ser                       | Glu                       |
|              | <i>Megathyrsus maximus</i>       | CBV65831                      | 687 (8)                                   | —                         | —                         |
|              | <i>Melinis minutiflora</i>       | CAM84075                      | 439 (4)                                   | —                         | —                         |
|              | <i>Microstegium sp. PC-2007</i>  | CAM84104                      | 439 (4)                                   | —                         | —                         |
|              | <i>Miscanthus sinensis</i>       | Misin18G159600                | 961*                                      | Ser                       | Gly                       |
|              | <i>Neurachne munroi</i>          | CCK33010                      | 588 (3)                                   | —                         | —                         |
|              | <i>Panicum capillare</i>         | CAM84110                      | 439 (4)                                   | —                         | —                         |
|              | <i>Panicum coloratum</i>         | CAM84116                      | 439 (4)                                   | —                         | —                         |
|              | <i>Panicum fluvicola</i>         | CBL93742                      | 801 (8)                                   | —                         | Gly                       |
|              | <i>Panicum hallii</i>            | PAN23802                      | 961*                                      | Gly                       | Gly                       |
|              | <i>Panicum laetum</i>            | CBT21623                      | 961* (8)                                  | Gly                       | Gly                       |
|              | <i>Panicum miliaceum</i>         | CBV65830                      | 750 (8)                                   | —                         | —                         |
|              | <i>Panicum pansum</i>            | CBT21624                      | 688 (8)                                   | —                         | —                         |
|              | <i>Panicum phragmitoides</i>     | CBT21625                      | 801 (8)                                   | —                         | Gly                       |
|              | <i>Panicum schinzii</i>          | CBY89214                      | 717 (8)                                   | —                         | —                         |
|              | <i>Panicum turgidum</i>          | CBR26851                      | 795 (8)                                   | —                         | Gly                       |
|              | <i>Panicum virgatum</i>          | Pavir.J09522                  | 961*                                      | Gly                       | Gly                       |
|              | <i>Paraneurachne muelleri</i>    | CCK33005                      | 588 (3)                                   | —                         | —                         |
|              | <i>Paspalum conjugatum</i>       | CAM84121                      | 439 (4)                                   | —                         | —                         |

[continued on next page ]

Table S1 (continued)

| PLANT FAMILY         | C4-PLANT SPECIES                      | ACCESSION NUMBER <sup>a</sup> | RESIDUES <sup>b</sup> (Ref.) <sup>c</sup> | POSITION 100 <sup>d</sup> | POSITION 937 <sup>d</sup> |
|----------------------|---------------------------------------|-------------------------------|-------------------------------------------|---------------------------|---------------------------|
|                      | <i>Paspalum dilatatum</i>             | CAM84122                      | 439 (4)                                   | —                         | —                         |
|                      | <i>Paspalum paniculatum</i>           | CCB84879                      | 884 (3)                                   | Gly                       | —                         |
|                      | <i>Paspalum quadrifarium</i>          | CAM84120                      | 439 (4)                                   | —                         | —                         |
|                      | <i>Saccharum officinarum</i>          | CAC08829                      | 961* (9)                                  | Ser                       | Gly                       |
|                      | <i>Saccharum spontaneum</i>           | CAC85930                      | 961* (9)                                  | Ser                       | Gly                       |
|                      | <i>Setaria adhaerens</i>              | CCB84858                      | 427 (3)                                   | —                         | —                         |
|                      | <i>Setaria italica</i>                | Si005789m                     | 964*                                      | Ser                       | Gly                       |
|                      | <i>Setaria megaphylla</i>             | CCB84863                      | 439 (3)                                   | —                         | —                         |
|                      | <i>Setaria palmifolia</i>             | CAM84130                      | 439 (4)                                   | —                         | —                         |
|                      | <i>Setaria plicata</i>                | CAM84131                      | 439 (4)                                   | —                         | —                         |
|                      | <i>Setaria viridis</i>                | Sevir.4G143500                | 964*                                      | Ser                       | Gly                       |
|                      | <i>Sorghum bicolor</i>                | Sb10g021330                   | 1028*                                     | Ser                       | Gly                       |
|                      | <i>Sorghum halepense</i>              | AHA39146                      | 347 (5)                                   | —                         | —                         |
|                      | <i>Sorghum interjectum</i>            | AHA39132                      | 347 (5)                                   | —                         | —                         |
|                      | <i>Sorghum intrans</i>                | AHA39142                      | 347 (5)                                   | —                         | —                         |
|                      | <i>Sorghum laxiflorum</i>             | AHA39139                      | 346 (5)                                   | —                         | —                         |
|                      | <i>Sorghum matarankense</i>           | AHA39134                      | 347 (5)                                   | —                         | —                         |
|                      | <i>Sorghum sorghoides</i>             | AHA39136                      | 347 (5)                                   | —                         | —                         |
|                      | <i>Sorghum stipoideum</i>             | AHA39113                      | 347 (5)                                   | —                         | —                         |
|                      | <i>Sorghum sudanense</i>              | AHA39145                      | 347 (5)                                   | —                         | —                         |
|                      | <i>Sorghum timorense</i>              | AHA39111                      | 347 (5)                                   | —                         | —                         |
|                      | <i>Sporobolus anglicus</i>            | CAM84132                      | 439 (4)                                   | —                         | —                         |
|                      | <i>Sporobolus festivus</i>            | CAM84134                      | 439 (4)                                   | —                         | —                         |
|                      | <i>Sporobolus schoenoides</i>         | CAM84099                      | 439 (4)                                   | —                         | —                         |
|                      | <i>Sporobolus sp. Hodgkinson s.n.</i> | CAM84090                      | 439 (4)                                   | —                         | —                         |
|                      | <i>Stenotaphrum dimidiatum</i>        | CAM84136                      | 439 (4)                                   | —                         | —                         |
|                      | <i>Stipagrostis pennata</i>           | CAX65714                      | 658 (10)                                  | —                         | —                         |
|                      | <i>Stipagrostis pennata Lausanne</i>  | CAX65713                      | 503 (10)                                  | —                         | —                         |
|                      | <i>Tetrapogon cenchriformis</i>       | CAM84140                      | 439 (4)                                   | —                         | —                         |
|                      | <i>Tragus racemosus</i>               | CAM84144                      | 439 (4)                                   | —                         | —                         |
|                      | <i>Tripogonella minima</i>            | CAM84145                      | 439 (4)                                   | —                         | —                         |
|                      | <i>Tristachya leucothrix</i>          | CAM84146                      | 439 (4)                                   | —                         | —                         |
|                      | <i>Urochloa villosa</i>               | CAM84088                      | 439 (4)                                   | —                         | —                         |
|                      | <i>Zea mays</i>                       | CAA33317                      | 970*(11)                                  | Ser                       | Gly                       |
|                      | <i>Zoysia japonica</i>                | CAM84149                      | 439 (4)                                   | —                         | —                         |
|                      | <i>Zuloagaea bulbosa</i>              | CBR26850                      | 688 (8)                                   | —                         | —                         |
| <b>EUDICOTS</b>      |                                       |                               |                                           |                           |                           |
| <b>Aizoaceae</b>     |                                       |                               |                                           |                           |                           |
|                      | <i>Trianthema portulacastrum</i>      | AIF35268                      | 400 (12)                                  | —                         | Glu                       |
| <b>Amaranthaceae</b> |                                       |                               |                                           |                           |                           |
|                      | <i>Alternanthera pungens</i>          | AAY28729                      | 966* (13)                                 | Lys                       | Glu                       |
|                      | <i>Amaranthus hypochondriacus</i>     | AAB18633                      | 964* (14)                                 | Lys                       | Asp                       |
|                      | <i>Bienertia cycloptera</i>           | ALH25077/<br>AHN09924         | 879† (15,16)                              | Lys                       | Glu                       |
|                      | <i>Bienertia sinuspersici</i>         | ABG20459                      | 968* (17)                                 | Lys                       | Glu                       |

[continued on next page ]

**Table S1** (continued)

| PLANT FAMILY         | C4-PLANT SPECIES              | ACCESSION NUMBER <sup>a</sup> | RESIDUES <sup>b</sup> (Ref.) <sup>c</sup> | POSITION 100 <sup>d</sup> | POSITION 937 <sup>d</sup> |
|----------------------|-------------------------------|-------------------------------|-------------------------------------------|---------------------------|---------------------------|
|                      | <i>Bienertia sinuspersici</i> | AHN09926                      | 510 (15)                                  | —                         | Glu                       |
|                      | <i>Gomphrena globosa</i>      | AIF35261                      | 204 (12)                                  | —                         | Glu                       |
|                      | <i>Haloxyton persicum</i>     | AIF35262                      | 519 (12)                                  | —                         | Glu                       |
|                      | <i>Suaeda acuminata</i>       | ALH25076/<br>AHN09928         | 879† (15,16)                              | Lys                       | Glu                       |
|                      | <i>Suaeda aralocaspica</i>    | ABG20460                      | 851 (17)                                  | —                         | Glu                       |
|                      | <i>Suaeda eltonica</i>        | ABG20461                      | 830 (17)                                  | —                         | Glu                       |
|                      | <i>Suaeda eltonica</i>        | ALH25062/<br>AHN09938         | 879† (15,16)                              | Lys                       | Glu                       |
|                      | <i>Tidestromia lanuginose</i> | AIF35263                      | 517 (12)                                  | —                         | Glu                       |
|                      | <i>Tidestromia valdesiana</i> | AIF35265                      | 519 (12)                                  | —                         | Glu                       |
| <b>Asteraceae</b>    |                               |                               |                                           |                           |                           |
|                      | <i>Flaveria bidentis</i>      | BAZ95841                      | 966*                                      | Lys                       | Glu                       |
|                      | <i>Flaveria trinervia</i>     | CAA43601                      | 966* (18)                                 | Lys                       | Glu                       |
| <b>Molluginaceae</b> |                               |                               |                                           |                           |                           |
|                      | <i>Hypertelis cerviana</i>    | CBM40391                      | 521 (12)                                  | —                         | Glu                       |

**REFERENCES:**

- Besnard, G., Muasya, A. M., Russier, F., Roalson, E. H., Salamin, N. and Christin, P. A. (2009) Phylogenomics of C<sub>4</sub> photosynthesis in sedges (Cyperaceae): Multiple appearances and genetic convergence. *Mol. Biol. Evol.* **26**, 1909–1919
- Agarie, S., Kai, M., Takatsuji, H. and Ueno, O. (2002) Environmental and hormonal regulation of gene expression of C<sub>4</sub> photosynthetic enzymes in the amphibious sedge *Eleocharis vivipara*. *Plant Sci.* **163**, 571–580
- Christin, P. A., Edwards, E. J., Besnard, G., Boxall, S. F., Gregory, R., Kellogg, E. A., Hartwell, J. and Osborne, C. P. (2012) Adaptive evolution of C<sub>4</sub> photosynthesis through recurrent lateral gene transfer. *Curr. Biol.* **22**, 445–449
- Christin, P. A., Salamin, N., Savolainen, V., Duvall, M. R. and Besnard, G. (2007) C<sub>4</sub> photosynthesis evolved in grasses via parallel adaptive genetic changes. *Curr. Biol.* **17**, 1241–1247
- Liu, Q., Liu, H., Wen, J. and Peterson, P. M. (2014) Infrageneric phylogeny and temporal divergence of *Sorghum* (Andropogoneae, Poaceae) based on low-copy nuclear and plastid sequences. *PLoS ONE* **9**, E104933
- Singh, J., Reddy, G. M., Agarwal, A., Chandrasekhar, K., Sopory, S. K., Reddy, M. K. and Kaul, T. (2012) Molecular and structural analysis of C<sub>4</sub>-specific PEPC isoform from *Pennisetum glaucum* plays a role in stress adaptation. *Gene* **500**, 224–231
- Liu, Q., Triplett, J. K., Wen, J. and Peterson, P. M. (2011) Allotetraploid origin and divergence in *Eleusine* (Chloridoideae, Poaceae): evidence from low-copy nuclear gene phylogenies and a plastid gene chronogram. *Ann. Bot.* **108**, 1287–1298
- Zimmermann, T., Bocksberger, G., Brüggemann, W., Berberich, T. (2013) Phylogenetic relationship and molecular taxonomy of African grasses of the genus *Panicum* inferred from four chloroplast DNA-barcodes and nuclear gene sequences. *J. Plant Res.* **126**, 363–371
- Besnard, G., Offmann, B., Robert, C., Rouch, C. and Cadet, F. (2002) Assessment of the C(4) phosphoenolpyruvate carboxylase gene diversity in grasses (Poaceae). *Theor. Appl. Genet.* **105**, 404–412
- Christin, P. A. and Besnard, G. (2009) Two independent C<sub>4</sub> origins in Aristidoideae (Poaceae) revealed by the recruitment of distinct phosphoenolpyruvate carboxylase genes. *Am. J. Bot.* **96**, 2234–2239
- Hudspeth, R. L. and Grula, J. W. (1989) Structure and expression of the maize gene encoding the phosphoenolpyruvate carboxylase isozyme involved in C<sub>4</sub> photosynthesis. *Plant Mol. Biol.* **12**, 579–589
- Christin, P. A., Arakaki, M., Osborne, C. P., Brautigam, A., Sage, R. F., Hibberd, J. M., Kelly, S., Covshoff, S., Wong, G. K., Hancock, L. and Edwards, E. J. (2014) Shared origins of a key enzyme during the evolution of C<sub>4</sub> and CAM metabolism. *J. Exp. Bot.* **65**, 3609–3621
- Gowik, U., Engelmann, S., Blasing, O. E., Raghavendra, A. S. and Westhoff, P. (2006) Evolution of C<sub>4</sub> phosphoenolpyruvate carboxylase in the genus *Alternanthera*: gene families and the enzymatic characteristics of the C<sub>4</sub> isozyme and its orthologues in C<sub>3</sub> and C<sub>3</sub>/C<sub>4</sub> *Alternantheras*. *Planta* **223**, 359–368
- Rydzik, E. and Berry, J. O. (1996) The electronic plant gene register. *Plant Physiol.* **110**, 713–714
- Rosnow, J. J., Edwards, G. E. and Roalson, E. H. (2014) Positive selection of Kranz and non-Kranz C<sub>4</sub> phosphoenolpyruvate carboxylase amino acids in Suaedoideae (Chenopodiaceae). *J. Exp. Bot.* **65**, 3595–3607
- Rosnow, J. J., Evans, M. C., Kapralov, M. V., Cousins, A. B., Edwards, G. E., Roalson, E. H. (2015) Kranz and single-cell forms of C<sub>4</sub> plants in the subfamily Suaedoideae show kinetic C<sub>4</sub> convergence for PEPC and Rubisco with divergent amino acid substitutions. *J. Exp. Bot.* **66**, 7347–7358
- Lara, M. V., Chuong, S. D., Akhiani, H., Andreo, C. S. and Edwards, G. E. (2006) Species having C<sub>4</sub> single-cell-type photosynthesis in the Chenopodiaceae family evolved a photosynthetic phosphoenolpyruvate carboxylase like that of Kranz-type C<sub>4</sub> species. *Plant Physiol.* **142**, 673–684
- Poetsch, W., Hermans, J. and Westhoff, P. (1991) Multiple cDNAs of phosphoenolpyruvate carboxylase in the C<sub>4</sub> dicot *Flaveria trinervia*. *FEBS Lett.* **292**, 133–136

**Table S2. CAM-PEPC and C3-PEPC isozymes that have Ser780**

<sup>a</sup>Every sequence included in this table has serine at position equivalent to 780 of *Zea mays* PEPC-C4 (*ZmPEPC*-C4, CAA33317) despite of being from a CAM or C3 plant as indicated within parenthesis. <sup>b</sup>Amino acid sequences were retrieved from GeneBank except those from *Helianthus annuus* that were found in Phytozome 12.1.5. <sup>c</sup>Most sequences are fragments lacking part of the N-terminal and/or C-terminal regions; only the sequence marked with \* is complete. <sup>d</sup>Numbers in parenthesis indicate the bibliographic reference of the paper where the sequence was reported, when any, given below the table.

| PLANT FAMILY             | PLANT SPECIES <sup>a</sup><br>(Photosynthetic metabolism) | ACCESSION NUMBER <sup>b</sup> | NUMBER OF RESIDUES <sup>c</sup><br>(Ref.) <sup>d</sup> |
|--------------------------|-----------------------------------------------------------|-------------------------------|--------------------------------------------------------|
| <b>MONOCOTS</b>          |                                                           |                               |                                                        |
| <i>Cyperaceae</i>        |                                                           |                               |                                                        |
|                          | <i>Rhynchospora colorata</i> (C3)                         | CAR63802                      | 456 (1)                                                |
| <b>EUDICOTS</b>          |                                                           |                               |                                                        |
| <i>Anacampserotaceae</i> |                                                           |                               |                                                        |
|                          | <i>Anacampseros albissima</i> (CAM)                       | AIF35194                      | 404 (2)                                                |
|                          | <i>Anacampseros kurtzii</i> (C3)                          | AIF35195                      | 197 (2)                                                |
|                          | <i>Anacampseros retusa</i> (CAM)                          | AIF35196                      | 415 (2)                                                |
|                          | <i>Grahamia bracteata</i> (C3)                            | AIF35197                      | 196 (2)                                                |
| <i>Asteraceae</i>        |                                                           |                               |                                                        |
|                          | <i>Cynara cardunculus</i> (CAM)                           | KVH88808                      | 849* (3)                                               |
|                          | <i>Helianthus annuus</i> (C3)                             | HanXRQChr17g0560511           | 269                                                    |
|                          | <i>Helianthus annuus</i> (C3)                             | HanXRQChr07g0190711           | 251                                                    |
| <i>Basellaceae</i>       |                                                           |                               |                                                        |
|                          | <i>Anredera baselloides</i> (CAM)                         | AIF35179                      | 518 (2)                                                |
|                          | <i>Anredera cordifolia</i> (CAM)                          | AIF35180                      | 189 (2)                                                |
|                          | <i>Anredera ramosa</i> (CAM)                              | AIF35182                      | 186 (2)                                                |
|                          | <i>Ullucus tuberosus</i> (CAM)                            | AIF35183                      | 389 (2)                                                |
| <i>Cactaceae</i>         |                                                           |                               |                                                        |
|                          | <i>Echinocactus grusonii</i> (CAM)                        | AIF35207                      | 518 (2)                                                |
|                          | <i>Echinocereus pectinatus</i> (CAM)                      | AIF35404                      | 504 (2)                                                |
|                          | <i>Ferocactus leucacanthus</i> (CAM)                      | AIF35209                      | 196 (2)                                                |
|                          | <i>Hylocereus undatus</i> (CAM)                           | AHF21553                      | 958* (2)                                               |
|                          | <i>Leuenbergeria aureiflora</i> (CAM)                     | AIF35199                      | 393 (2)                                                |
|                          | <i>Leuenbergeria bleo</i> (CAM)                           | AIF35200                      | 196 (2)                                                |
|                          | <i>Leuenbergeria guamacho</i> (CAM)                       | AIF35203                      | 393 (2)                                                |
|                          | <i>Leuenbergeria portulacifolia</i> (CAM)                 | AIF35204                      | 196 (2)                                                |
|                          | <i>Mammillaria plumosa</i> (CAM)                          | AIF35208                      | 196 (2)                                                |
|                          | <i>Opuntia cochenillifera</i> (CAM)                       | AIF35403                      | 518 (2)                                                |
|                          | <i>Pereskia aculeata</i> (CAM)                            | AIF35198                      | 518 (2)                                                |
|                          | <i>Pereskia diaz-romeroana</i> (CAM)                      | AIF35201                      | 393 (2)                                                |
|                          | <i>Pereskia grandifolia</i> (CAM)                         | AIF35202                      | 196 (2)                                                |
|                          | <i>Pereskiaopsis gatesii</i> (CAM)                        | AIF35205                      | 195 (2)                                                |
|                          | <i>Tephrocactus articulatus</i> (CAM)                     | AIF35206                      | 196 (2)                                                |
|                          | <i>Weingartia kargliana</i> (CAM)                         | AIF35210                      | 196 (2)                                                |
| <i>Didiereaceae</i>      |                                                           |                               |                                                        |
|                          | <i>Alluaudiopsis marnieriana</i> (CAM)                    | AIF35185                      | 195 (2)                                                |
|                          | <i>Alluaudia procera</i> (CAM)                            | AIF35184                      | 195 (2)                                                |
|                          | <i>Didierea madagascariensis</i> (CAM)                    | AIF35187                      | 293 (2)                                                |
|                          | <i>Portulacaria longipedunculata</i> (CAM)                | AIF35230                      | 527 (2)                                                |

| PLANT FAMILY                | PLANT SPECIES <sup>a</sup><br>(Photosynthetic metabolism) | ACCESSION NUMBER <sup>b</sup> | NUMBER OF RESIDUES <sup>c</sup><br>(Ref.) <sup>d</sup> |
|-----------------------------|-----------------------------------------------------------|-------------------------------|--------------------------------------------------------|
| <b><i>Euphorbiaceae</i></b> |                                                           |                               |                                                        |
|                             | <i>Ricinus communis</i> (C3)                              | EEF27881                      | 852                                                    |
| <b><i>Halophytaceae</i></b> |                                                           |                               |                                                        |
|                             | <i>Halophytum ameghinoi</i> (CAM)                         | AIF35178                      | 518 (2)                                                |
| <b><i>Talinaceae</i></b>    |                                                           |                               |                                                        |
|                             | <i>Talinella pachypoda</i> (CAM)                          | AIF35193                      | 196 (2)                                                |
|                             | <i>Talinum fruticosum</i> (CAM)                           | AIF35192                      | 196 (4)                                                |
|                             | <i>Talinum paniculatum</i> (CAM)                          | AIF35191                      | 196 (2)                                                |

**REFERENCES:**

1. Bruhl, J. J. and Wilson K. L. (2007) Towards a comprehensive survey of C3 and C4 photosynthetic pathways in Cyperaceae. *Aliso* **23**, 99–148
2. Christin, P. A., Arakaki, M., Osborne, C. P., Brautigam, A., Sage, R. F., Hibberd, J. M., Kelly, S., Covshoff, S., Wong, G. K., Hancock, L. and Edwards, E. J. (2014) Shared origins of a key enzyme during the evolution of C<sub>4</sub> and CAM metabolism. *J. Exp. Bot.* **65**, 3609–3621
3. Jaradat, A. A. (2010) Genetic resources of energy crops: Biological systems to combat climate change. *Aust. J. Crop Sci.* **4**, 309–323
4. <http://tropical.theferns.info/viewtropical.php?id=Talinum+fruticosum>

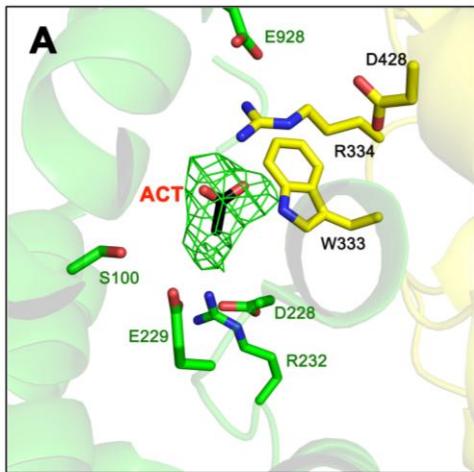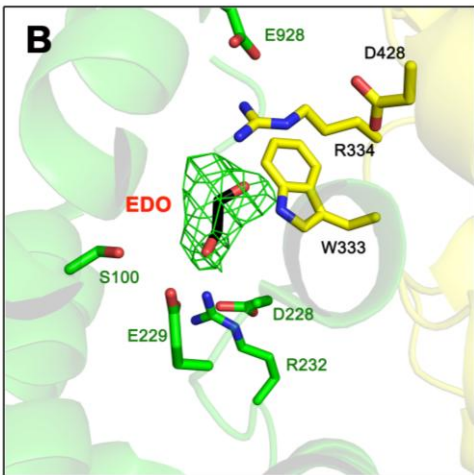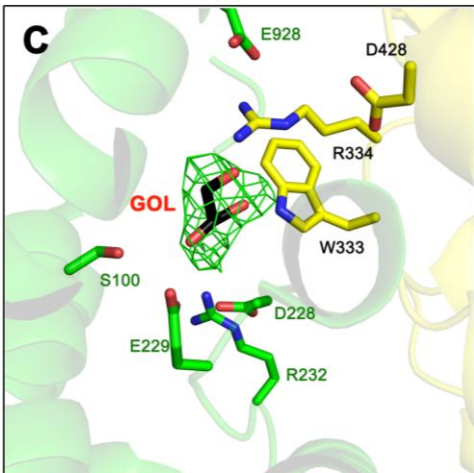

**Supplementary Figure S1. Omit electronic density map of the ligand bound in the allosteric-site for neutral amino acids of *ZmPEPC-C4*.** The simulated annealing omit electron density map ( $F_o - F_c$ ) contoured at  $3.0 \sigma$  level is shown as a green mesh. Acetate (ACT, panel A), ethylene glycol (EDO, panel B) or glycerol (GOL, panel C) were modeled into this omit electron density map. As can be seen, none of these molecules gave a good fit. The side chains of amino acid residues are shown as sticks with oxygen atoms in red, nitrogen atoms in blue, and carbon atoms in green (subunit A) or yellow (subunit B). ACT, EDO and GOL are shown as sticks colored similarly but with black carbons. The simulated annealing omit map was calculated using Phenix (1) following simulated annealing refinement at 3,000 K. Images were generated using PyMOL.



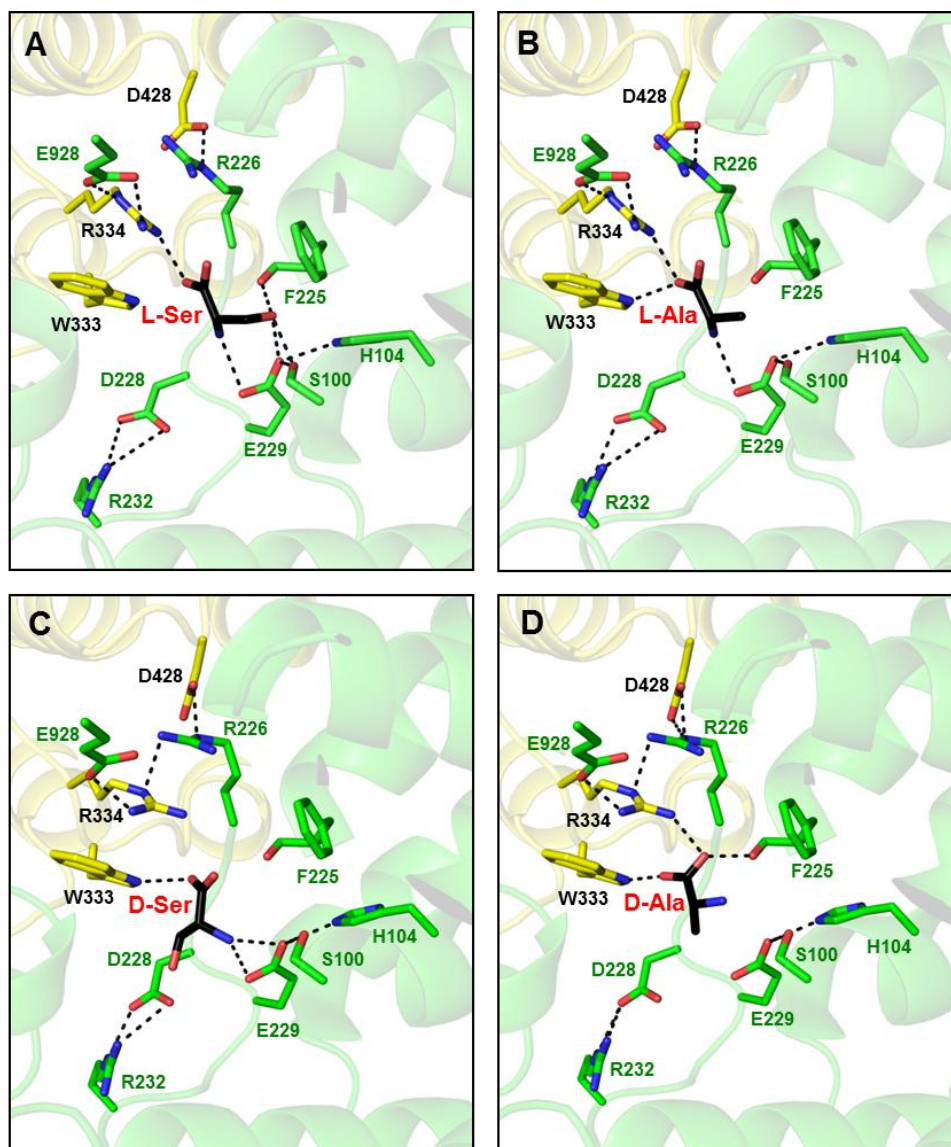

**Supplementary Figure S2. Energy-minimized models of D/L-alanine and D/L-serine molecules docked into the allosteric-site for neutral amino acids of the *ZmPEPC-C4 5VYJ* structure.** The glycine molecule in this crystal structure was manually removed from the electronic density map before rigidly docking D/L-alanine and D/L-serine molecules, which  $\alpha$ -carboxyl and  $\alpha$ -amino groups make the same interactions as the corresponding groups of the bound glycine. Docking simulations were performed using the PyMOL building mode and then subjected to a 1000-step energy-minimization process using the Amber force field parameters in the UCSF Chimera (2). The side chain of amino acid residues and the bound amino acids are shown as sticks with oxygen atoms in red, nitrogen atoms in blue, and carbon atoms in green (subunit A), yellow (subunit B) or pink (D/L-alanine and D/L-serine ligands). Hydrogen bonds (cut-off 3 Å) are depicted as black dashed lines. The four amino acids fit well inside the neutral amino acid allosteric site and made several interactions with protein residues, consistent with their proven ability to activate the enzyme. Images were generated using PyMOL.

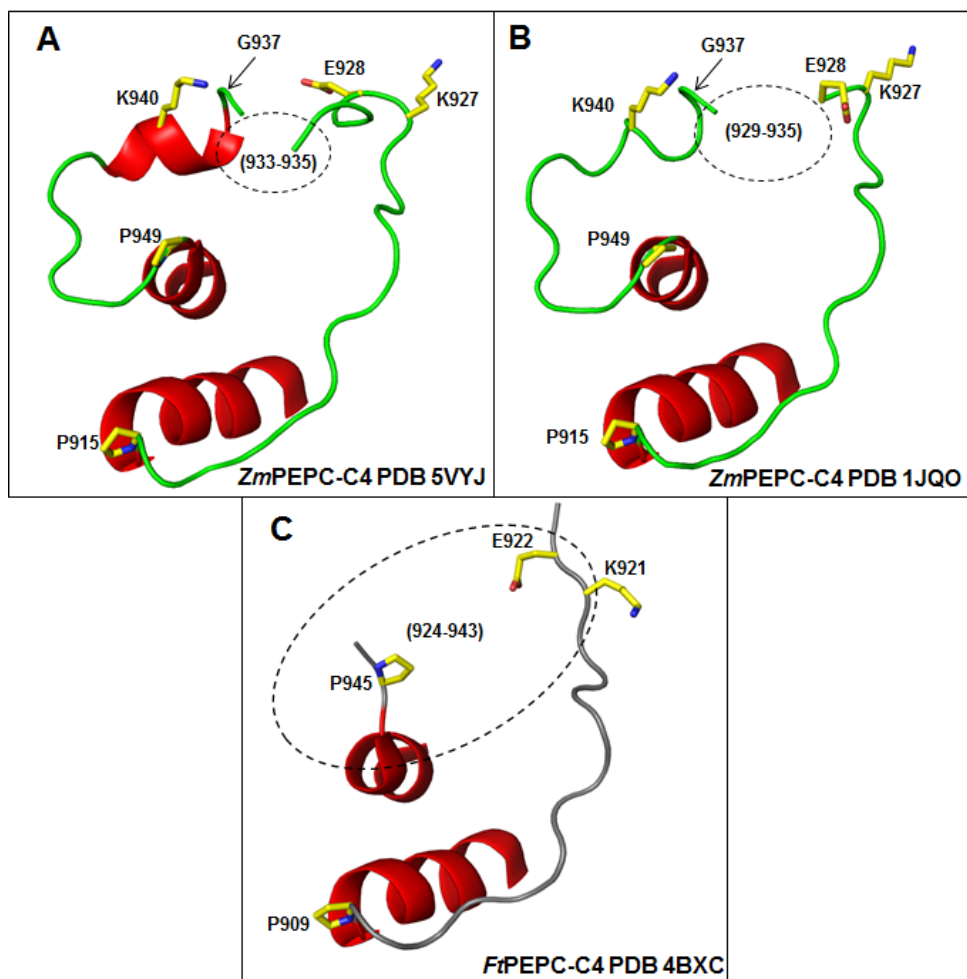

**Supplementary Figure S3. Exposed loop at the carboxy-terminal region of PEPC-C4 isoenzymes.** Cartoon representation of the exposed loop extending from Pro915/Pro909 to Pro949/945 (*ZmPEPC-C4*/*FtPEPC-C4* numbering); these two proline residues are absolutely conserved. The side chains of the two proline flanking the loop as well as those of Lys927/921 and Glu928, when observed in the crystal structure, are shown as sticks with carbon atoms in yellow, oxygen in red and nitrogen in blue. A black arrow marks the position of Gly937 in the two *ZmPEPC-C4* structures. (A) In the 5VYJ *ZmPEPC-C4* crystal structure, which has a glycine molecule bound at its allosteric site, three residues (Asn933, Lys934 and Pro935) do not exhibit electronic density, and five residues (Leu938, Val939, Lys940, Leu941 and Asn942) form a short  $\alpha$ -helix within the loop. (B) In the 1JQO *ZmPEPC-C4* crystal structure, which has an empty allosteric site for neutral amino acids, seven residues (Phe929, Ala930, Asp931, Glu932, Asn933, Lys934 and Pro935) do not exhibit electronic density. (C) In the 4BXC *FtPEPC-C4* crystal structure no electronic density was found associated with the side chains of residues 924 to 943, suggesting a high flexibility of this region. The dotted ellipses represent the disordered stretches of residues with no electronic density. Images were generated using PyMOL.

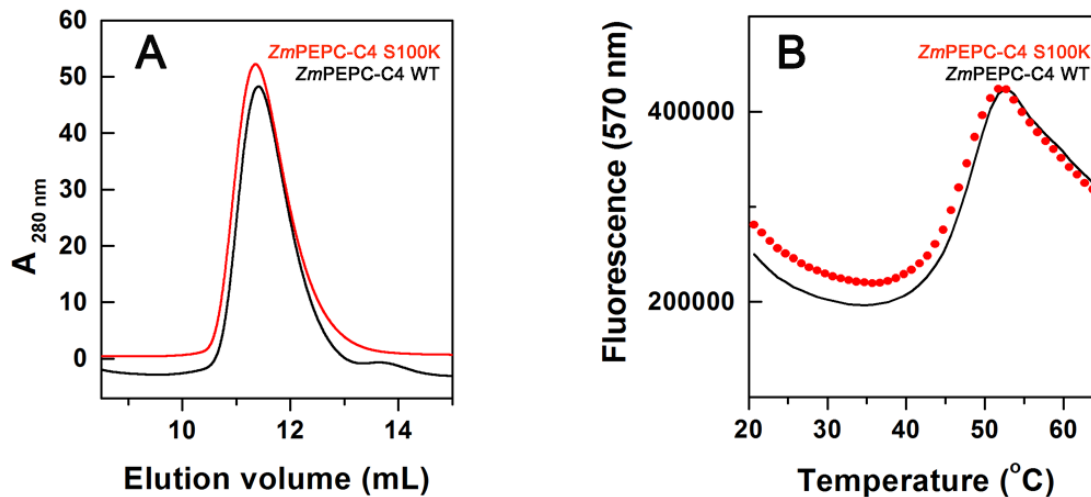

**Supplementary Figure S4. Oligomeric state and thermal stability of wild-type and S100K *ZmPEPC-C4* enzymes.** (A) Size-exclusion chromatography elution profile obtained using a Superdex 200 10/300 (GE Healthcare Life Sciences) column in an ÄKTA Pure 25 (GE Healthcare Life Sciences). The proteins (at 0.8 mg/mL) were in 50 mM Hepes-KOH, pH 7.4, buffer containing 50 mM NaCl, 10% (v/v) glycerol and 2 mM 2-mercaptoethanol. The column was eluted with the same buffer at 0.5 mL/min rate. (B) Thermal denaturation curves obtained using a StepOnePlus Real Time PCR system. The proteins (at 2.2 mg/mL) were in the same buffer as for the size-exclusion chromatography experiments. Heat-induced transitions were determined by following the changes in SYPRO Orange (Sigma-Aldrich) fluorescence intensity. The temperature range was 20–90 °C and the scan rate 1.0 °C/min. A representative curve of three different experiments is shown in the figure. Transitions were evaluated with a Boltzmann function using the Protein Thermal Shift™ Software v1.0. The estimated apparent melting temperatures ( $appT_m$ ) were 48.8 °C for the wild-type and 47.75 °C for the S100K mutant.

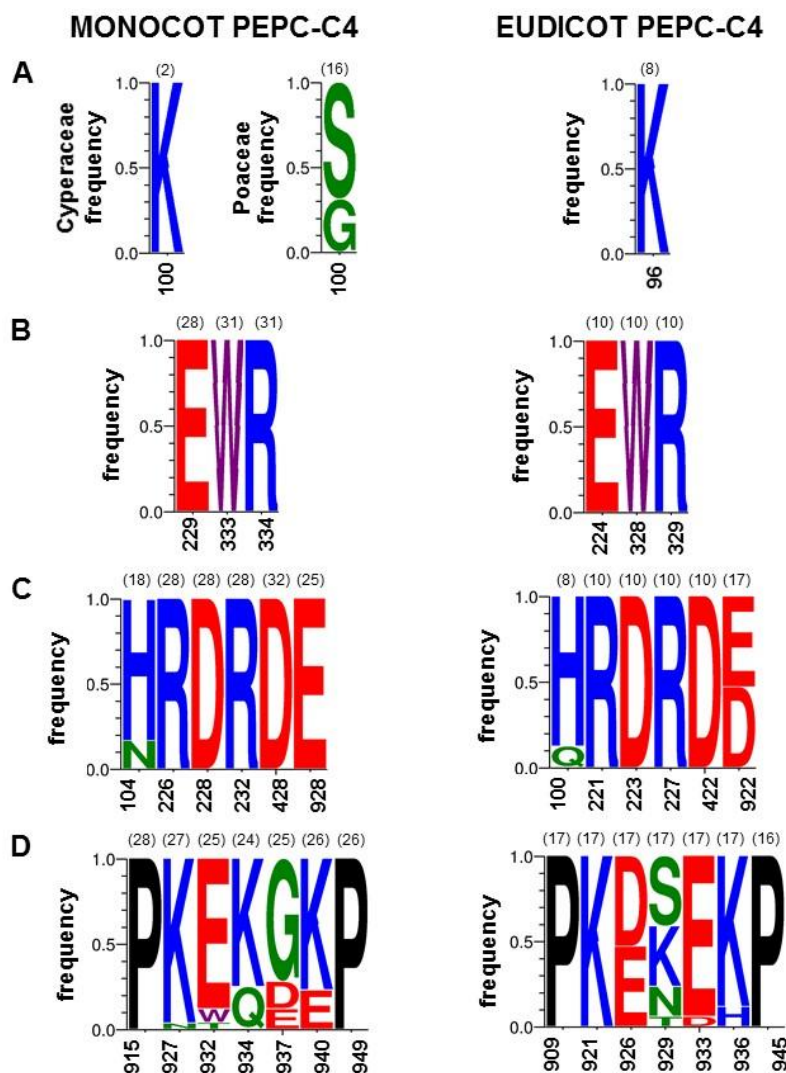

**Supplementary Figure S5. Sequence logos of PEPC-C4 residues located at or near the region equivalent to that of the allosteric site for neutral amino acids of *Zm*PEPC-C4.** The sequences of PEPC-C4 isozymes were selected considering as C4 those PEPCs that have a serine at the position equivalent to 780 in *Zm*PEPC-C4 (CAA33317) (3) and that, in addition, belong to a C4 plant. Residues numbering is that of *Zm*PEPC-C4 for monocot sequences and that of *Ft*PEPC-C4 (CAA43601) for eudicot sequences. (A) Conservation of residue at position 100/96. (B) Conservation of residues directly involved in binding the neutral amino acid. (C) Conservation of residues involved in the web of hydrogen bonds that stabilize the conformation of the neutral amino acid allosteric site. (D) Conservation of residues that have been related to the allosteric site for neutral amino acids by previous site-directed mutagenesis studies, as well as the two proline residues that flank the loop to which they belong. The amino acids color scheme was according to their chemical properties: polar (G, S, T, Q, N), green; aromatic (W), purple; basic (K, R, H), blue; acidic (D, E), red; and hydrophobic (P), black. Given that most of the retrieved sequences were partial, within parenthesis above each position is given the number of sequences analyzed.

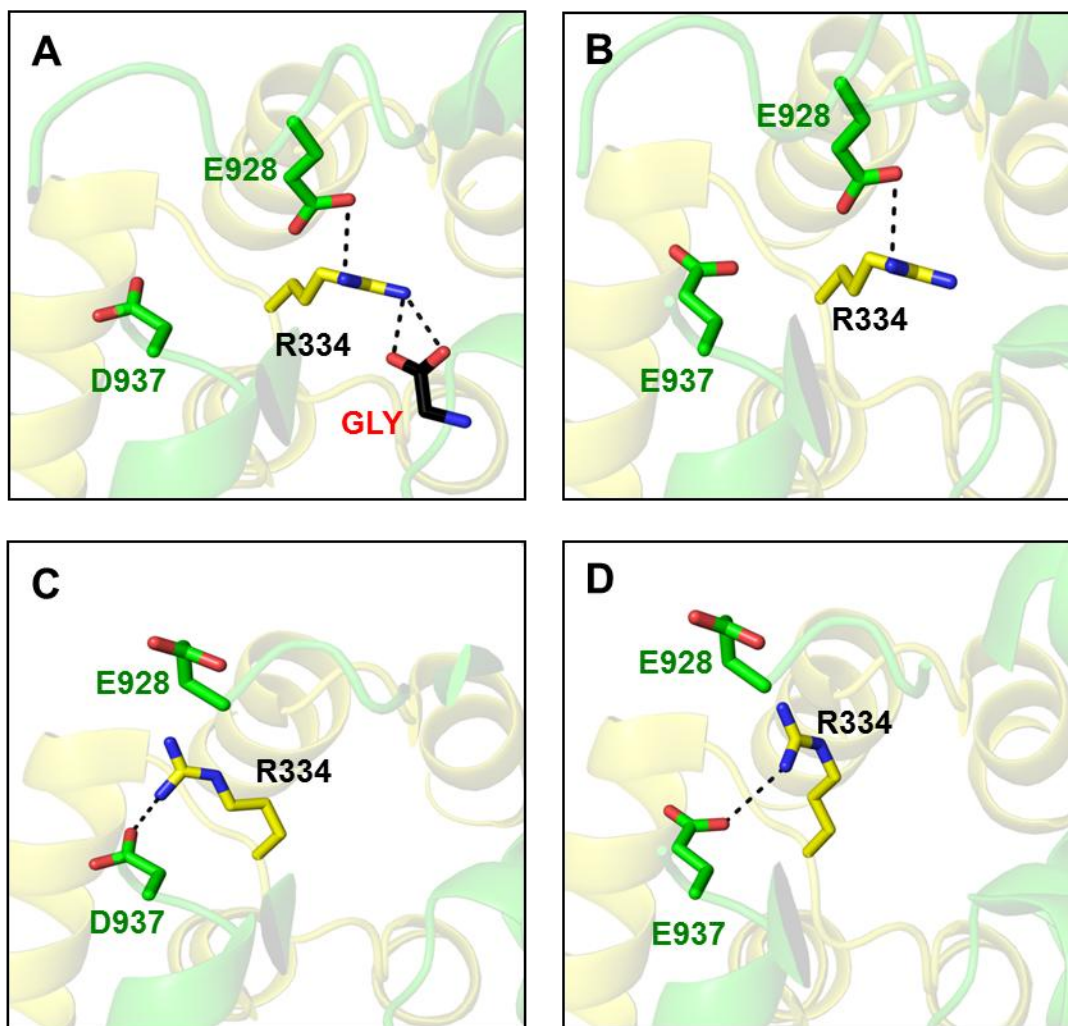

**Supplementary Figure S6. *In silico* change of Gly937 of *ZmPEPC-C4* for aspartate or glutamate.** Cartoon representation of the region near Gly937 showing the relevant amino acid residues and the activator glycine molecule as sticks. *In silico* mutations of Gly937 for aspartate or glutamate were generated using the 5VYJ crystal structure reported here and the standard rotamer library of Coot (4). Hydrogen bonds (cut-off 3 Å) are depicted as black dashed lines. Coloring is as in Supplementary Fig. S1. When glycine is bound to its allosteric site, the model shows that Glu/Asp937 are exposed to the solvent, not interacting with any other protein residue, and Arg334 is in the “inside” conformation interacting with the activator glycine molecule (panels A and B). But Asp/Glu937 could form a hydrogen bond with Arg334 of the opposing subunit if the arginine residue is modeled in the exposed “outside” conformation observed in the *ZmPEPC-C4* 1JQO crystal structure, where there is no ligand bound in the allosteric-site for neutral amino acids (panels C and D). Images were generated using PyMOL.

## REFERENCES

1. Adams, P. D., Grosse-Kunstleve, R. W., Hung, L. W., Ioerger, T. R., McCoy, A. J., Moriarty, N. W., Read, R. J., Sacchettini, J. C., Sauter, N. K. and Terwilliger, T. C. (2002) PHENIX: building new software for automated crystallographic structure determination. *Acta Crystallogr. D Biol. Crystallogr.* **58**, 1948–1954
2. Pettersen, E. F., Goddard, T. D., Huang, C. C., Couch, G. S., Greenblatt, D. M., Meng, E. C. and Ferrin, T. E. (2004) UCSF Chimera: a visualization system for exploratory research and analysis. *J. Comput. Chem.* **25**, 1605–1612
3. Bläsing, O. E., Westhoff, P. and Svensson, P. (2000) Evolution of C4 phosphoenolpyruvate carboxylase in *Flaveria*, a conserved serine in the carboxyterminal part of the enzyme is a major determinant for C4-specific characteristics. *J. Biol. Chem.* **275**, 27917–27923
4. Emsley, P. and Cowtan, K. (2004) Coot: model-building tools for molecular graphics. *Acta Crystallogr. D Biol. Crystallogr.* **60**, 2126–2132
